# Supplementary material for: Low Bone Mineral Density on Computed Tomography: Association with Poor Survival after Transcatheter Aortic Valve Replacement
Source: MDPI journal article supplement (doi:10.3390/jcm13092698), 2024-05-03
Supplement: s1 [file s1]

## Supplementary Materials

**Table S1.** A descriptive analysis comparing included and excluded patients.

|                                                                                                                                                                                                                                                                                                                                                                                                    | Excluded<br>N=452 | Included<br>N=770 | p-value |
|----------------------------------------------------------------------------------------------------------------------------------------------------------------------------------------------------------------------------------------------------------------------------------------------------------------------------------------------------------------------------------------------------|-------------------|-------------------|---------|
| Age                                                                                                                                                                                                                                                                                                                                                                                                | 81.1 (6.97)       | 80.7 (6.72)       | 0.387   |
| Sex                                                                                                                                                                                                                                                                                                                                                                                                | 0.49 (0.50)       | 0.54 (0.50)       | 0.077   |
| CT bone density                                                                                                                                                                                                                                                                                                                                                                                    | NA                | 147 (75.4)        |         |
| Diabetes                                                                                                                                                                                                                                                                                                                                                                                           | 0.23 (0.42)       | 0.25 (0.43)       | 0.367   |
| Hypertension                                                                                                                                                                                                                                                                                                                                                                                       | 0.58 (0.49)       | 0.57 (0.49)       | 0.927   |
| Smoking                                                                                                                                                                                                                                                                                                                                                                                            | 0.02 (0.15)       | 0.03 (0.17)       | 0.503   |
| PAD                                                                                                                                                                                                                                                                                                                                                                                                | 0.05 (0.23)       | 0.07 (0.25)       | 0.355   |
| CAD                                                                                                                                                                                                                                                                                                                                                                                                | 0.03 (0.16)       | 0.01 (0.12)       | 0.180   |
| Heart Failure                                                                                                                                                                                                                                                                                                                                                                                      | 0.19 (0.39)       | 0.19 (0.39)       | 0.991   |
| CAD                                                                                                                                                                                                                                                                                                                                                                                                | 0.48 (0.50)       | 0.52 (0.50)       | 0.192   |
| CVI                                                                                                                                                                                                                                                                                                                                                                                                | 0.12 (0.32)       | 0.11 (0.31)       | 0.655   |
| CABG                                                                                                                                                                                                                                                                                                                                                                                               | 0.06 (0.23)       | 0.06 (0.24)       | 0.913   |
| COPD                                                                                                                                                                                                                                                                                                                                                                                               | 0.12 (0.32)       | 0.08 (0.28)       | 0.064   |
| AF                                                                                                                                                                                                                                                                                                                                                                                                 | 0.30 (0.46)       | 0.27 (0.44)       | 0.244   |
| Cancer                                                                                                                                                                                                                                                                                                                                                                                             | 0.15 (0.36)       | 0.14 (0.35)       | 0.708   |
| Creatinin mg/dl                                                                                                                                                                                                                                                                                                                                                                                    | 1.29 (0.85)       | 1.27 (0.81)       | 0.679   |
| Triglycerides mg/dl                                                                                                                                                                                                                                                                                                                                                                                | 114 (55.3)        | 110 (57.1)        | 0.259   |
| Cholesterol mg/dl                                                                                                                                                                                                                                                                                                                                                                                  | 147 (44.6)        | 144 (42.6)        | 0.272   |
| Bilirubin mg/dl                                                                                                                                                                                                                                                                                                                                                                                    | 0.63 (0.39)       | 0.65 (0.46)       | 0.400   |
| GOT U/L                                                                                                                                                                                                                                                                                                                                                                                            | 27.6 (23.1)       | 30.0 (72.4)       | 0.415   |
| GPT U/L                                                                                                                                                                                                                                                                                                                                                                                            | 24.2 (23.2)       | 26.4 (53.4)       | 0.329   |
| NTproBNP pg/ml                                                                                                                                                                                                                                                                                                                                                                                     | 4962 (7048)       | 4287 (6158)       | 0.129   |
| Hemoglobin g/dl                                                                                                                                                                                                                                                                                                                                                                                    | 11.7 (1.85)       | 12.1 (1.94)       | 0.005   |
| LVEF %                                                                                                                                                                                                                                                                                                                                                                                             | 55.9 (13.6)       | 56.7 (12.9)       | 0.373   |
| GFR                                                                                                                                                                                                                                                                                                                                                                                                | 58.1 (24.9)       | 59.7 (23.8)       | 0.430   |
| EuroScore_II                                                                                                                                                                                                                                                                                                                                                                                       | 4.42 (0.96)       | 4.77 (3.54)       | 0.052   |
| AF= Atrial fibrillation; PAD= peripheral artery disease; CVD= Cerebrovascular disease; CHF= chronic heart failure; CAD= Coronary artery disease; CVI= Cerebrovascular insult; CABG= Coronary artery bypass grafting; COPD= Chronic pulmonary disease; GOT= serum glutamic oxaloacetic transaminase; GPT= serum glutamic pyruvic transaminase; NTproBNP= N-terminal pro-B-type natriuretic peptide; |                   |                   |         |

**Table S2.** Univariate Analysis.

|        | 95 % CI          | p value |
|--------|------------------|---------|
| Age    | 1.01 [0.99;1.04] | 0,196   |
| Sex    | 1.14 [0.86;1.53] | 0,362   |
| Height | 1.02 [1.00;1.04] | 0,104   |
| Weight | 1.01 [0.99;1.02] | 0,347   |

|                                                                                                                                                                                                                                                      |                   |       |
|------------------------------------------------------------------------------------------------------------------------------------------------------------------------------------------------------------------------------------------------------|-------------------|-------|
| BMI kg/m2                                                                                                                                                                                                                                            | 1.00 [0.97;1.04]  | 0,915 |
| Euro_score_II                                                                                                                                                                                                                                        | 1.04 [1.01;1.06]  | 0,007 |
| LVEF (%)                                                                                                                                                                                                                                             | 0.99 [0.97;1.00]  | 0,016 |
| Co-morbidities                                                                                                                                                                                                                                       |                   |       |
| AF before TAVR                                                                                                                                                                                                                                       | 1.70 [1.26;2.31]  | 0,001 |
| Diabetes                                                                                                                                                                                                                                             | 1.49 [1.09;2.03]  | 0,013 |
| Hypertension                                                                                                                                                                                                                                         | 0.97 [0.72;1.31]  | 0,853 |
| Smoking                                                                                                                                                                                                                                              | 2.18 [1.19;4.02]  | 0,012 |
| PAD                                                                                                                                                                                                                                                  | 2.03 [1.29;3.21]  | 0,002 |
| CVD                                                                                                                                                                                                                                                  | 1.75 [0.65;4.71]  | 0,27  |
| CHF                                                                                                                                                                                                                                                  | 1.77 [1.28;2.45]  | 0,001 |
| CAD                                                                                                                                                                                                                                                  | 1.37 [1.01;1.85]  | 0,04  |
| CVI                                                                                                                                                                                                                                                  | 1.34 [0.87;2.06]  | 0,184 |
| CABG                                                                                                                                                                                                                                                 | 2.07 [1.27;3.37]  | 0,004 |
| COPD                                                                                                                                                                                                                                                 | 1.94 [1.28;2.94]  | 0,002 |
| AF                                                                                                                                                                                                                                                   | 1.70 [1.26;2.31]  | 0,001 |
| Cancer                                                                                                                                                                                                                                               | 1.65 [1.16;2.37]  | 0,006 |
| CT bone density                                                                                                                                                                                                                                      |                   |       |
| CT bone density                                                                                                                                                                                                                                      | 1.32 [1.068;1.65] | 0,010 |
| AF= Atrial fibrillation; PAD= peripheral artery disease; CVD= Cerebrovascular disease; CHF= chronic heart failure; CAD= Coronary artery disease; CVI= Cerebrovascular insult; CABG= Coronary artery bypass grafting; COPD= Chronic pulmonary disease |                   |       |
